# Supplementary material
Source: Research Square preprint supplement (doi:10.21203/rs.3.rs-9235518/v1)
Supplement: Supplementary file 1 [file 5124098e12eb7cf9bac43bd0.xlsx]

## Sheet: Sheet1
Table S1. Feeding behavior of R. padi on bx6-3 mutants. Waveforms were analyzed using StyletA software, and Excel for automatic parameter workbook for calculation (Sarria et al., 2009). In red and bold are significant parameters relative to wildtype by Wilcoxon test, P < 0.05 or P < 0.1, respectively.
Phase	Parameter short name	Parameter full name	Unit	SV WT			bx6-3			ChiSquare (H Statistic)	P-Value, Wilcoxon test
				n = 16			n = 19
				mean		SE	mean		SE
Epidermis	Time to 1st probe from start of EPG	t_1Pr	hr	0.21	±	0.05	0.44	±	0.22	1.05	0.3047
Epidermis and mesophyll	Number of F	n_F	count	1.19	±	0.44	0.84	±	0.36	3.61	0.0575
	Total duration of F	s_F	hr	1.13	±	0.38	0.45	±	0.13	2.4	0.1213
	% of probing spent in F	%probtimeinF	%	18.88	±	5.79	7.96	±	2.15	1.67	0.1967
All tissue	Number of probes	n_Pr	count	9.13	±	1.38	7.47	±	1.27	0.9	0.3437
	Number of np	n_Np	count	9.56	±	1.39	7.58	±	1.29	1.24	0.2656
	Number of pd	n_pd	count	80.56	±	10	70.63	±	10.19	0.69	0.4077
	Duration of nonprobe period before the 1st E	s_np.1E	hr	0.68	±	0.17	1.63	±	0.37	2.53	0.112
	Total duration of np	s_np	hr	2.06	±	0.3	2.08	±	0.36	0.05	0.8167
	Number of pd-S during the 6th hour	n_pd-S.in6thH	count	10.13	±	3.18	2.47	±	1.12	3.14	0.0766
	Total duration of pd	s_pd	hr	0.1	±	0.01	0.09	±	0.01	0.53	0.4663
	Number of C	n_C	count	16.63	±	2.09	13.37	±	1.81	1.67	0.1961
	Total duration of C	s_C	hr	2.48	±	0.25	2.45	±	0.27	0.001	0.9736
	% of probing spent in C	%probtimeinC	%	42.08	±	3.91	44.41	±	5.33	0.004	0.9472
Phloem	Number of E1	n_E1	count	5.56	±	0.95	4.42	±	0.98	1.62	0.2027
	Mean duration of E1	a_E1	hr	0.02	±	<0.001	0.02	±	<0.001	0.22	0.6383
	Total duration of E1	s_E1	hr	0.12	±	0.04	0.12	±	0.04	0.33	0.5629
	Total duration of E1 followed by E2	s_E1followedbyE2	hr	0.06	±	0.02	0.07	±	0.03	0.01	0.9223
	% of probing spent in E1	%probtimeinE1	%	1.89	±	0.54	1.81	±	0.57	0.22	0.6383
	Number of E2	n_E2	count	2.06	±	0.54	2	±	0.51	0.59	0.4434
	Total duration of E2	s_E2	hr	1.52	±	0.58	2.33	±	0.54	1.74	0.1877
	Mean duration of E2	a_E2	hr	0.9	±	0.37	1.24	±	0.33	2.29	0.1304
	Potential E2 index	E2index	%	61.08	±	9.36	61.08	±	9.36	5.29	0.0214
	% E2 >10 min	%sE2/E2	%	57.74	±	12.81	63.97	±	8.7	0.002	0.9666
	Total duration of E	s_E	hr	1.34	±	0.49	2.07	±	0.51	1.1	0.2944
	% of probing spent in E2	%probtimeinE2	%	24.09	±	8.9	34.55	±	7.42	1.26	0.2617
Xylem	Number of G	n_G	count	2.25	±	0.42	1.74	±	0.24	3.07	0.0799
	Duration of G	s_G	hr	2.2	±	0.33	1.47	±	0.29	3.31	0.0687
	% of probing spent in G	%probtimeinG	%	38.01	±	5.47	25.88	±	4.57	3.31	0.0687

## Sheet: Sheet2
Table S1. Feeding behavior of R. padi on bx6-3 mutants. Waveforms were analyzed using StyletA software, and Excel for automatic parameter workbook for calculation (Sarria et al., 2009). In red and bold are significant parameters relative to wildtype by Wilcoxon test, P < 0.05 or P < 0.1, respectively.
Phase	Parameter short name	Parameter full name	Unit	SV WT			bx6-3			ChiSquare	P-Value,
				n = 16			n = 19			(H Statistic)	Wilcoxon test
				mean		SE	mean		SE
Epidermis	Time to 1st probe from start of EPG	t_1Pr	hr	0.21	±	0.05	0.44	±	0.22	1.05	0.3047
Epidermis and mesophyll	Number of F	n_F	count	1.19	±	0.44	0.84	±	0.36	3.61	0.0575
	Total duration of F	s_F	hr	1.13	±	0.38	0.45	±	0.13	2.4	0.1213
	% of probing spent in F	%probtimeinF	%	18.88	±	5.79	7.96	±	2.15	1.67	0.1967
All tissue	Number of probes	n_Pr	count	9.13	±	1.38	7.47	±	1.27	0.9	0.3437
	Number of np	n_Np	count	9.56	±	1.39	7.58	±	1.29	1.24	0.2656
	Number of pd	n_pd	count	80.56	±	10	70.63	±	10.19	0.69	0.4077
	Duration of nonprobe period before the 1st E	s_np.1E	hr	0.68	±	0.17	1.63	±	0.37	2.53	0.112
	Total duration of np	s_np	hr	2.06	±	0.3	2.08	±	0.36	0.05	0.8167
	Number of pd-S during the 6th hour	n_pd-S.in6thH	count	10.13	±	3.18	2.47	±	1.12	3.14	0.0766
	Total duration of pd	s_pd	hr	0.1	±	0.01	0.09	±	0.01	0.53	0.4663
	Number of C	n_C	count	16.63	±	2.09	13.37	±	1.81	1.67	0.1961
	Total duration of C	s_C	hr	2.48	±	0.25	2.45	±	0.27	0.001	0.9736
	% of probing spent in C	%probtimeinC	%	42.08	±	3.91	44.41	±	5.33	0.004	0.9472
Phloem	Number of E1	n_E1	count	5.56	±	0.95	4.42	±	0.98	1.62	0.2027
	Mean duration of E1	a_E1	hr	0.02	±	<0.001	0.02	±	<0.001	0.22	0.6383
	Total duration of E1	s_E1	hr	0.12	±	0.04	0.12	±	0.04	0.33	0.5629
	Total duration of E1 followed by E2	s_E1followedbyE2	hr	0.06	±	0.02	0.07	±	0.03	0.01	0.9223
	% of probing spent in E1	%probtimeinE1	%	1.89	±	0.54	1.81	±	0.57	0.22	0.6383
	Number of E2	n_E2	count	2.06	±	0.54	2	±	0.51	0.59	0.4434
	Total duration of E2	s_E2	hr	1.52	±	0.58	2.33	±	0.54	1.74	0.1877
	Mean duration of E2	a_E2	hr	0.9	±	0.37	1.24	±	0.33	2.29	0.1304
	Potential E2 index	E2index	%	61.08	±	9.36	61.08	±	9.36	5.29	0.0214
	% E2 >10 min	%sE2/E2	%	57.74	±	12.81	63.97	±	8.7	0.002	0.9666
	Total duration of E	s_E	hr	1.34	±	0.49	2.07	±	0.51	1.1	0.2944
	% of probing spent in E2	%probtimeinE2	%	24.09	±	8.9	34.55	±	7.42	1.26	0.2617
Xylem	Number of G	n_G	count	2.25	±	0.42	1.74	±	0.24	3.07	0.0799
	Duration of G	s_G	hr	2.2	±	0.33	1.47	±	0.29	3.31	0.0687
	% of probing spent in G	%probtimeinG	%	38.01	±	5.47	25.88	±	4.57	3.31	0.0687
